# Supplementary material for: Depressive symptoms mediate the association between sleep duration and chronic low back pain in US adults: evidence from the 2009-2010 NHANES
Source: Research Square preprint supplement (doi:10.21203/rs.3.rs-6311945/v1), 2025-06-02
Supplement: Supplementary file 1 [file cee51ebcee09b67fbe15f2da.docx]

**Table S1.** The number and percentage of missing values.

| Variables | n(%) |
| --- | --- |
| Marital status | 3(0.06) |
| BMI (kg/m2) | 36(0.75) |
| Drinking status | 8(0.17) |
| Hypertension | 62(1.29) |
| Diabetes | 61(1.27) |
| Cardiovascular disease | 21(0.44) |
| Cancer | 2 (0.04) |
| Sitting time(hours) | 11(0.23) |
| Physical activity | 3(0.06) |
| CRP(mg/L) | 181(3.77) |
